# Supplementary material
Source: PubMed Central journal article supplement (PMC6842682)
Supplement: NIHMS1532997-supplement-1.pdf [file NIHMS1532997-supplement-1.pdf]

**Supplemental Table 1: ART Regimens**

| ART Regimens                                                                                                                                                                                                                                                                      |                     |
|-----------------------------------------------------------------------------------------------------------------------------------------------------------------------------------------------------------------------------------------------------------------------------------|---------------------|
| Two or more Nucleoside Reverse Transcriptase Inhibitors (NRTI) in combination with:<br>(1) A Non-Nucleoside Reverse Transcriptase Inhibitor (NNRTI)<br>(2) Ritonavir plus one or more Protease Inhibitor (PI)<br>(3) A Protease Inhibitor (PI)<br>(4) An Integrase Inhibitor (II) | <b>Regimen Type</b> |
|                                                                                                                                                                                                                                                                                   | NNRTI               |
|                                                                                                                                                                                                                                                                                   | Boosted PI          |
|                                                                                                                                                                                                                                                                                   | Unboosted PI        |
| (5) Three or more NRTI containing abacavir and not including an II, PI, or NNRTI                                                                                                                                                                                                  | II                  |
| (6) Three or more antiretroviral medications from at least two different categories (NRTI, PI, NNRTI, II) not meeting any other criteria                                                                                                                                          | 3NRTI               |
|                                                                                                                                                                                                                                                                                   | Other               |

**Supplemental Table 2: Type of Refractive Surgery by Refractive Error**

| <b>CPT</b>   | <b>ICD9</b>   |               |               |               |               |               |               | <b>Total</b> |
|--------------|---------------|---------------|---------------|---------------|---------------|---------------|---------------|--------------|
|              | <b>367.00</b> | <b>367.10</b> | <b>367.20</b> | <b>367.21</b> | <b>367.40</b> | <b>367.81</b> | <b>367.90</b> |              |
| <b>65760</b> | 0             | 1             | 0             | 0             | 0             | 0             | 0             | 1            |
| <b>65771</b> | 0             | 0             | 1             | 1             | 0             | 0             | 0             | 2            |
| <b>65772</b> | 0             | 0             | 0             | 0             | 1             | 0             | 0             | 1            |
| <b>66999</b> | 1             | 8             | 2             | 0             | 1             | 0             | 0             | 12           |
| <b>S0800</b> | 1             | 6             | 7             | 5             | 2             | 0             | 1             | 22           |
| <b>S0810</b> | 0             | 19            | 12            | 5             | 0             | 1             | 4             | 41           |
| <b>Total</b> | 2             | 34            | 22            | 11            | 4             | 1             | 5             | 79           |

**Supplemental Table 3. Baseline characteristics of HIV+ participants with refractive surgery by complications**

|                                       | Overall               | complications          |                         | P-value |
|---------------------------------------|-----------------------|------------------------|-------------------------|---------|
|                                       | N (%) or Median (IQR) | No (%) or Median (IQR) | Yes (%) or Median (IQR) |         |
| <b>Participants</b>                   | 79                    | 73                     | 6                       |         |
| <b>Demographics</b>                   |                       |                        |                         |         |
| <b>Age at surgery</b>                 | 31.2 (26.6,38.7)      | 31.3 (26.7,38.7)       | 28.8 (26.6,31.2)        | 0.437   |
| <b>Gender</b>                         |                       |                        |                         | 0.4651  |
| <i>Male</i>                           | 73 (92.4)             | 67 (91.8)              | 6 (100.0)               |         |
| <i>Female</i>                         | 6 (7.6)               | 6 (8.2)                | 0 (0.0)                 |         |
| <b>Race</b>                           |                       |                        |                         | 0.4928  |
| <i>Caucasian</i>                      | 31 (39.2)             | 28 (38.4)              | 3 (50.0)                |         |
| <i>African-American</i>               | 34 (43.0)             | 31 (42.5)              | 3 (50.0)                |         |
| <i>Hispanic/Other</i>                 | 14 (17.7)             | 14 (19.2)              | 0 (0.0)                 |         |
| <b>Marital status</b>                 |                       |                        |                         | 0.5789  |
| <i>Single</i>                         | 37 (46.8)             | 33 (45.2)              | 4 (66.7)                |         |
| <i>Married</i>                        | 40 (50.6)             | 38 (52.1)              | 2 (33.3)                |         |
| <i>N/A</i>                            | 2 (2.5)               | 2 (2.7)                | 0 (0.0)                 |         |
| <b>Rank</b>                           |                       |                        |                         | 0.4106  |
| <i>Officer/Warrant</i>                | 15 (19.0)             | 15 (20.5)              | 0 (0.0)                 |         |
| <i>Enlisted</i>                       | 62 (78.5)             | 56 (76.7)              | 6 (100.0)               |         |
| <i>N/A (e.g. Dependent)</i>           | 2 (2.5)               | 2 (2.7)                | 0 (0.0)                 |         |
| <b>Duty Status</b>                    |                       |                        |                         | 0.8889  |
| <i>Active Duty</i>                    | 60 (75.9)             | 55 (75.3)              | 5 (83.3)                |         |
| <i>Retired</i>                        | 18 (22.8)             | 17 (23.3)              | 1 (16.7)                |         |
| <i>Dependent</i>                      | 1 (1.3)               | 1 (1.4)                | 0 (0.0)                 |         |
| <b>Service</b>                        |                       |                        |                         | 0.0836  |
| <i>Air Force</i>                      | 7 (8.9)               | 7 (9.6)                | 0 (0.0)                 |         |
| <i>Army</i>                           | 25 (31.6)             | 25 (34.2)              | 0 (0.0)                 |         |
| <i>Marines</i>                        | 8 (10.1)              | 8 (11.0)               | 0 (0.0)                 |         |
| <i>Navy</i>                           | 39 (49.4)             | 33 (45.2)              | 6 (100.0)               |         |
| <b>HIV related</b>                    |                       |                        |                         |         |
| <b>Age HIV dx</b>                     | 25.5 (22.8,31.3)      | 25.5 (22.7,32.1)       | 25.5 (24.5,26.9)        | 0.8099  |
| <b>CD4 at HIV dx (cells/ul)</b>       | 505.0 (380.0,615.0)   | 506.0 (380.0,614.0)    | 469.0 (462.0,628.0)     | 0.6667  |
| <b>VL at HIV dx (log10 copies/ml)</b> | 4.5 (3.9,4.8)         | 4.5 (3.9,4.8)          | 4.1 (2.4,5.1)           | 0.5757  |
| <b>HIV to surgery</b>                 | 4.1 (2.1,7.7)         | 4.1 (2.1,7.7)          | 4.0 (2.2,4.4)           | 0.7113  |
| <b>Age ART star</b>                   | 28.7 (23.9,34.3)      | 28.7 (23.7,35.3)       | 28.7 (25.2,33.5)        | 0.966   |
| <b>ART Initiation Era</b>             |                       |                        |                         | 0.4305  |
| <i>1996-2000</i>                      | 18 (22.8)             | 16 (21.9)              | 2 (33.3)                |         |
| <i>2001-2008</i>                      | 23 (29.1)             | 20 (27.4)              | 3 (50.0)                |         |
| <i>2009-2017</i>                      | 28 (35.4)             | 27 (37.0)              | 1 (16.7)                |         |
| <i>No ART Record Start</i>            | 10 (12.7)             | 10 (13.7)              | 0 (0.0)                 |         |
| <b>Time from ART to surgery</b>       | 3.2 (0.6,6.0)         | 3.3 (0.8,6.2)          | 0.7 (0.1,2.1)           | 0.115   |
| <b>CD4 at ART (cells/ul)</b>          | 421.0 (301.0,515.0)   | 413.0 (289.0,506.0)    | 543.0 (399.0,628.0)     | 0.0841  |
| <b>VL at ART (log10 copies/ml)</b>    | 4.5 (3.8,4.9)         | 4.5 (3.8,4.9)          | 4.3 (3.3,4.6)           | 0.5771  |
| <b>History of AIDS</b>                |                       |                        |                         | 0.0219  |
| <i>No</i>                             | 77 (97.5)             | 72 (98.6)              | 5 (83.3)                |         |
| <i>Yes</i>                            | 2 (2.5)               | 1 (1.4)                | 1 (16.7)                |         |
| <b>Year of surgery</b>                |                       |                        |                         | 0.0508  |
| <i>1997-2000</i>                      | 7 (8.9)               | 6 (8.2)                | 1 (16.7)                |         |
| <i>2001-2005</i>                      | 17 (21.5)             | 16 (21.9)              | 1 (16.7)                |         |
| <i>2006-2010</i>                      | 20 (25.3)             | 16 (21.9)              | 4 (66.7)                |         |
| <i>2011-2016</i>                      | 35 (44.3)             | 35 (47.9)              | 0 (0.0)                 |         |
| <b>Type of Surgery</b>                |                       |                        |                         | 0.0206  |
| <i>Lasik</i>                          | 23 (29.1)             | 23 (31.5)              | 0 (0.0)                 |         |
| <i>PRK</i>                            | 53 (67.1)             | 48 (65.8)              | 5 (83.3)                |         |
| <i>RK</i>                             | 2 (2.5)               | 1 (1.4)                | 1 (16.7)                |         |
| <i>Astigmatic Correction</i>          | 1 (1.3)               | 1 (1.4)                | 0 (0.0)                 |         |

|                                              |                     |                     |                     |        |
|----------------------------------------------|---------------------|---------------------|---------------------|--------|
| <b>CD4 at surgery (cells/ul)</b>             | 624.0 (446.0,744.0) | 623.0 (458.0,754.0) | 658.0 (416.0,675.0) | NR*    |
| <b>VL at surgery (log10 copies/ml)</b>       | 1.7 (1.3,3.4)       | 1.7 (1.3,3.4)       | 3.3 (2.6,3.8)       | NR*    |
| <b>ART status at surgery</b>                 |                     |                     |                     | NR*    |
| <i>Yes</i>                                   | 50 (63.3)           | 47 (64.4)           | 3 (50.0)            |        |
| <i>No</i>                                    | 29 (36.7)           | 26 (35.6)           | 3 (50.0)            |        |
| <b>ART Therapy by class surgery</b>          |                     |                     |                     | NR*    |
| <i>Boosted PI</i>                            | 3 (6.0)             | 2 (4.3)             | 1 (33.3)            |        |
| <i>II</i>                                    | 8 (16.0)            | 8 (17.0)            | 0 (0.0)             |        |
| <i>NNRTI</i>                                 | 33 (66.0)           | 32 (68.1)           | 1 (33.3)            |        |
| <i>Unboosted PI</i>                          | 3 (6.0)             | 2 (4.3)             | 1 (33.3)            |        |
| <b>Diabetes Mellitus Type II at baseline</b> |                     |                     |                     | 0.5562 |
| <i>Yes</i>                                   | 4 (5.1)             | 4 (5.5)             | 0 (0.0)             |        |
| <i>No</i>                                    | 75 (94.9)           | 69 (94.5)           | 6 (100.0)           |        |
| <b>Hypertension at baseline</b>              |                     |                     |                     | 0.7552 |
| <i>Yes</i>                                   | 22 (27.8)           | 20 (27.4)           | 2 (33.3)            |        |
| <i>No</i>                                    | 57 (72.2)           | 53 (72.6)           | 4 (66.7)            |        |
| <b>Hyperlipidemia at baseline</b>            |                     |                     |                     | 0.7201 |
| <i>Yes</i>                                   | 34 (43.0)           | 31 (42.5)           | 3 (50.0)            |        |
| <i>No</i>                                    | 45 (57.0)           | 42 (57.5)           | 3 (50.0)            |        |
| <b>Tobacco smoking at baseline</b>           |                     |                     |                     | 0.5171 |
| <i>Yes</i>                                   | 50 (72.5)           | 47 (73.4)           | 3 (60.0)            |        |
| <i>No</i>                                    | 19 (27.5)           | 17 (26.6)           | 2 (40.0)            |        |

NR\* - not reported due to differing follow-up between groups

Supplemental Table 4. Logistic regression model on risk factors for complications

|                                        | Odds ratio | 95% confidence intervals |        | P-value |
|----------------------------------------|------------|--------------------------|--------|---------|
|                                        |            | Lower                    | Upper  |         |
| Age at surgery, per year               | 1.05       | 0.94                     | 1.18   | 0.4157  |
| <b>Race</b>                            |            |                          |        |         |
| <i>Caucasian</i>                       | Ref        |                          |        |         |
| <i>African-American</i>                | 1.11       | 0.21                     | 5.94   | 0.9055  |
| <b>Marital status</b>                  |            |                          |        |         |
| <i>Single</i>                          | Ref        |                          |        |         |
| <i>Married</i>                         | 2.30       | 0.40                     | 13.39  | 0.353   |
| <b>Duty Status</b>                     |            |                          |        |         |
| <i>Active Duty</i>                     | Ref        |                          |        |         |
| <i>Retired</i>                         | 1.55       | 0.17                     | 14.16  | 0.7001  |
| Age HIV dx per year                    | 1.06       | 0.91                     | 1.24   | 0.4545  |
| CD4 at HIV dx (cells/ul)               | 1.00       | 0.99                     | 1.00   | 0.6508  |
| VL at HIV dx (log10 copies/ml)         | 1.00       | 1.00                     | 1.00   | 0.6335  |
| HIV to surgery, per year               | 1.05       | 0.85                     | 1.30   | 0.6594  |
| Age ART start, per year                | 1.03       | 0.92                     | 1.15   | 0.6452  |
| <b>ART Initiation Era</b>              |            |                          |        |         |
| 1996-2000                              | Ref        |                          |        |         |
| 2001-2008                              | 0.83       | 0.12                     | 5.61   | 0.8513  |
| 2009-2017                              | 3.38       | 0.28                     | 40.25  | 0.3362  |
| CD4 at ART (cells/ul)                  | 1.00       | 0.99                     | 1.00   | 0.0868  |
| VL at ART (log10 copies/ml)            | 1.00       | 1.00                     | 1.00   | 0.9668  |
| <b>History of AIDS</b>                 |            |                          |        |         |
| <i>No</i>                              | Ref        |                          |        |         |
| <i>Yes</i>                             | 0.07       | 0.00                     | 1.28   | 0.073   |
| <b>Year of surgery</b>                 |            |                          |        |         |
| 1997-2000                              | Ref        |                          |        |         |
| 2001-2005                              | 2.67       | 0.14                     | 49.76  | 0.5112  |
| 2006-2010                              | 0.67       | 0.06                     | 7.23   | 0.7388  |
| <b>Type of Surgery</b>                 |            |                          |        |         |
| PRK                                    | 9.60       | 0.52                     | 178.14 | 0.1291  |
| RK                                     | Ref        |                          |        |         |
| CD4 at surgery (cells/ul)              | 1.00       | 1.00                     | 1.01   | 0.5006  |
| VL at surgery (log10 copies/ml)        | 0.55       | 0.27                     | 1.11   | 0.0958  |
| <b>ART status at surgery</b>           |            |                          |        |         |
| <i>No</i>                              | Ref        |                          |        |         |
| <i>Yes</i>                             | 1.81       | 0.34                     | 9.61   | 0.4873  |
| <b>ART Therapy by class at surgery</b> |            |                          |        |         |
| <i>NNRTI</i>                           | Ref        |                          |        |         |
| <i>Boosted PI</i>                      | 0.30       | 0.03                     | 3.60   | 0.3424  |
| <i>Unboosted PI</i>                    | 0.70       | 0.07                     | 7.22   | 0.7654  |
| <b>Hypertension</b>                    |            |                          |        |         |
| <i>No</i>                              | Ref        |                          |        |         |
| <i>Yes</i>                             | 0.76       | 0.13                     | 4.45   | 0.7557  |
| <b>Hyperlipidemia</b>                  |            |                          |        |         |
| <i>No</i>                              | Ref        |                          |        |         |
| <i>Yes</i>                             | 0.74       | 0.14                     | 3.91   | 0.7209  |
| <b>Smoking</b>                         |            |                          |        |         |
| <i>No</i>                              | Ref        |                          |        |         |
| <i>Yes</i>                             | 0.54       | 0.08                     | 3.53   | 0.5223  |
